# Supplementary material for: Repeated dose (90 days) oral toxicity study of ursolic acid in Han-Wistar rats
Source: PubMed Central journal article supplement (PMC7229404; doi:10.1016/j.toxrep.2020.04.005), 2020-05-08
Supplement: mmc1.pdf [file mmc1.pdf]

Table A: Summary of the histopathology findings in alphabetic order; effect of UA on tissues A-E. N.V.L = no visible lesions. One animal showed infiltration of mononuclear cell in the epididymis in the high dose group in males.

|                             |                                        | Male                |                           |                           |                            | Female              |                           |                           |                            |
|-----------------------------|----------------------------------------|---------------------|---------------------------|---------------------------|----------------------------|---------------------|---------------------------|---------------------------|----------------------------|
|                             |                                        | Group 1,<br>Control | Group 2,<br>100 mg/kg/day | Group 3,<br>300 mg/kg/day | Group 4,<br>1000 mg/kg/day | Group 1,<br>Control | Group 2,<br>100 mg/kg/day | Group 3,<br>300 mg/kg/day | Group 4,<br>1000 mg/kg/day |
|                             | <b>Number of animals</b>               | 10                  | 10                        | 10                        | 10                         | 10                  | 10                        | 10                        | 10                         |
| <b>Artery, aorta</b>        | Examined                               | 10                  | 0                         | 0                         | 10                         | 10                  | 0                         | 0                         | 10                         |
|                             | N.V.L                                  | 10                  | -                         | -                         | 10                         | 10                  | -                         | -                         | 10                         |
| <b>Bone, femur</b>          | Examined                               | 10                  | 0                         | 0                         | 10                         | 10                  | 0                         | 0                         | 10                         |
|                             | N.V.L                                  | 10                  | -                         | -                         | 10                         | 10                  | -                         | -                         | 10                         |
| <b>Bone, sternum</b>        | Examined                               | 10                  | 0                         | 0                         | 10                         | 10                  | 0                         | 0                         | 10                         |
|                             | N.V.L                                  | 10                  | -                         | -                         | 10                         | 10                  | -                         | -                         | 10                         |
| <b>Bone marrow, femur</b>   | Examined                               | 10                  | 0                         | 0                         | 10                         | 10                  | 0                         | 0                         | 10                         |
|                             | N.V.L                                  | 10                  | -                         | -                         | 10                         | 10                  | -                         | -                         | 10                         |
| <b>Bone marrow, sternum</b> | Examined                               | 10                  | 0                         | 0                         | 10                         | 10                  | 0                         | 0                         | 10                         |
|                             | N.V.L                                  | 10                  | -                         | -                         | 10                         | 10                  | -                         | -                         | 10                         |
| <b>Bone marrow, smear</b>   | Examined                               | 10                  | 0                         | 0                         | 10                         | 10                  | 0                         | 0                         | 10                         |
|                             | N.V.L                                  | 10                  | -                         | -                         | 10                         | 10                  | -                         | -                         | 10                         |
| <b>Brain</b>                | Examined                               | 10                  | 0                         | 0                         | 10                         | 10                  | 0                         | 0                         | 10                         |
|                             | N.V.L                                  | 10                  | -                         | -                         | 10                         | 10                  | -                         | -                         | 10                         |
| <b>Cervix</b>               | Examined                               | -                   | -                         | -                         | -                          | 10                  | 0                         | 0                         | 10                         |
|                             | N.V.L                                  | -                   | -                         | -                         | -                          | 10                  | -                         | -                         | 10                         |
| <b>Epididymis</b>           | Examined                               | 10                  | 0                         | 0                         | 10                         | -                   | -                         | -                         | -                          |
|                             | N.V.L                                  | 10                  | -                         | -                         | 9                          | -                   | -                         | -                         | -                          |
|                             | Infiltration, mononuclear cell minimal | 0                   | -                         | -                         | 1                          | -                   | -                         | -                         | -                          |
| <b>Esophagus</b>            | Examined                               | 10                  | 0                         | 0                         | 10                         | 10                  | 0                         | 0                         | 10                         |
|                             | N.V.L                                  | 10                  | -                         | -                         | 10                         | 10                  | -                         | -                         | 10                         |
| <b>Eye</b>                  | Examined                               | 10                  | 0                         | 0                         | 10                         | 10                  | 0                         | 0                         | 10                         |
|                             | N.V.L                                  | 10                  | -                         | -                         | 10                         | 10                  | -                         | -                         | 10                         |

Table B: Summary of the histopathology findings in alphabetic order; effect of UA on the gait and glands. N.V.L = no visible lesions. One male showed minimal infiltration of mononuclear cells in the harderian gland in the high dose group.

|                           |                                       | Male                |                           |                           |                            | Female              |                           |                           |                            |
|---------------------------|---------------------------------------|---------------------|---------------------------|---------------------------|----------------------------|---------------------|---------------------------|---------------------------|----------------------------|
|                           |                                       | Group 1,<br>Control | Group 2,<br>100 mg/kg/day | Group 3,<br>300 mg/kg/day | Group 4,<br>1000 mg/kg/day | Group 1,<br>Control | Group 2,<br>100 mg/kg/day | Group 3,<br>300 mg/kg/day | Group 4,<br>1000 mg/kg/day |
|                           | <b>Number of animals</b>              | 10                  | 10                        | 10                        | 10                         | 10                  | 10                        | 10                        | 10                         |
| <b>Gait</b>               | Examined                              | 10                  | 0                         | 0                         | 10                         | 10                  | 0                         | 0                         | 10                         |
|                           | N.V.L                                 | 10                  | -                         | -                         | 10                         | 10                  | -                         | -                         | 10                         |
| <b>Gland, adrenal</b>     | Examined                              | 10                  | 0                         | 0                         | 10                         | 10                  | 0                         | 0                         | 10                         |
|                           | N.V.L                                 | 10                  | -                         | -                         | 10                         | 10                  | -                         | -                         | 10                         |
| <b>Gland, harderian</b>   | Examined                              | 10                  | 0                         | 0                         | 10                         | 10                  | 0                         | 0                         | 10                         |
|                           | N.V.L                                 | 9                   | -                         | -                         | 9                          | 7                   | -                         | -                         | 9                          |
|                           | Infiltration mononuclear cell minimal | 1                   | -                         | -                         | 1                          | 0                   | -                         | -                         | 1                          |
|                           | Mild                                  | 0                   | -                         | -                         | 0                          | 3                   | -                         | -                         | 0                          |
| <b>Gland, lacrimal</b>    | Examined                              | 10                  | 0                         | 0                         | 10                         | 10                  | 10                        | 10                        | 10                         |
|                           | N.V.L                                 | 10                  | -                         | -                         | 0                          | 10                  | 10                        | 10                        | 9                          |
|                           | Mild atrophy                          | 0                   | -                         | -                         | 0                          | 0                   | 0                         | 0                         | 1                          |
|                           | Minimal infiltration mononuclear cell | 0                   | -                         | -                         | 1                          | 0                   | 0                         | 0                         | 0                          |
| <b>Gland, mammary</b>     | Examined                              | 9                   | 0                         | 0                         | 10                         | 10                  | 0                         | 0                         | 10                         |
|                           | N.V.L                                 | 9                   | -                         | -                         | 10                         | 10                  | -                         | -                         | 10                         |
|                           | Not present in section                | 1                   | 0                         | 0                         | 0                          | -                   | -                         | -                         | -                          |
| <b>Gland, parathyroid</b> | Examined                              | 10                  | 0                         | 0                         | 8                          | 9                   | 0                         | 0                         | 6                          |
|                           | N.V.L                                 | 10                  | 0                         | 0                         | 8                          | 9                   | -                         | -                         | 6                          |
|                           | Not present in section                | 0                   | -                         | -                         | 2                          | 1                   | 0                         | 0                         | 4                          |

Table C: Summary of the histopathology findings in alphabetic order; effect of UA on tissues G-K. N.V.L = no visible lesions. One male (control group) and one female (high dose group) showed minimal mononuclear cell infiltration in the kidney.

|                                    |                                       | Male                |                           |                           |                            | Female              |                           |                           |                            |
|------------------------------------|---------------------------------------|---------------------|---------------------------|---------------------------|----------------------------|---------------------|---------------------------|---------------------------|----------------------------|
|                                    |                                       | Group 1,<br>Control | Group 2,<br>100 mg/kg/day | Group 3,<br>300 mg/kg/day | Group 4,<br>1000 mg/kg/day | Group 1,<br>Control | Group 2,<br>100 mg/kg/day | Group 3,<br>300 mg/kg/day | Group 4,<br>1000 mg/kg/day |
|                                    | <b>Number of animals</b>              | 10                  | 10                        | 10                        | 10                         | 10                  | 10                        | 10                        | 10                         |
| <b>Gland, pituitary</b>            | Examined                              | 10                  | 0                         | 0                         | 10                         | 9                   | 0                         | 0                         | 10                         |
|                                    | N.V.L                                 | 10                  | -                         | -                         | 10                         | 9                   | -                         | -                         | 10                         |
|                                    | Not present in second                 | -                   | -                         | -                         | -                          | 1                   | 0                         | 0                         | 0                          |
| <b>Gland, prostate</b>             | Examined                              | 10                  | 0                         | 0                         | 10                         | -                   | -                         | -                         | -                          |
|                                    | N.V.L                                 | 9                   | -                         | -                         | 8                          | -                   | -                         | -                         | -                          |
|                                    | Infiltration mononuclear minimal      | 1                   | -                         | -                         | 2                          | -                   | -                         | -                         | -                          |
| <b>Gland, salivary, mandibular</b> | Examined                              | 10                  | 0                         | 0                         | 10                         | 10                  | 0                         | 0                         | 10                         |
|                                    | N.V.L                                 | 10                  | -                         | -                         | 10                         | 10                  | -                         | -                         | 10                         |
| <b>Gland, seminal vesicle</b>      | Examined                              | 10                  | 0                         | 0                         | 10                         | -                   | -                         | -                         | -                          |
|                                    | N.V.L                                 | 10                  | -                         | -                         | 10                         | -                   | -                         | -                         | -                          |
| <b>Gland, thyroid</b>              | Examined                              | 10                  | 0                         | 0                         | 10                         | 0                   | 0                         | 10                        | 10                         |
|                                    | N.V.L                                 | 10                  | -                         | -                         | 10                         | -                   | -                         | 10                        | 10                         |
| <b>Heart</b>                       | Examined                              | 10                  | 0                         | 0                         | 10                         | 0                   | 0                         | 10                        | 10                         |
|                                    | N.V.L                                 | 10                  | -                         | -                         | 10                         | -                   | -                         | 10                        | 10                         |
|                                    | Minimal infiltration mononuclear cell | 0                   | -                         | -                         | 0                          | -                   | -                         | 0                         | -                          |
| <b>Kidney</b>                      | Examined                              | 10                  | 0                         | 0                         | 10                         | 10                  | 10                        | 10                        | 10                         |
|                                    | N.V.L                                 | 9                   | -                         | -                         | 10                         | 10                  | 0                         | 0                         | 9                          |
|                                    | Degeneration; tubular                 | 1                   | -                         | -                         | 0                          | 0                   | -                         | -                         | 0                          |
|                                    | Infiltration mononuclear cell minimal | 1                   | -                         | -                         | 0                          | 0                   | -                         | -                         | 1                          |

Table D: Summary of the histopathology findings in alphabetic order; effect of UA on large intestines, liver, lung and mandibular lymph node. N.V.L = no visible lesions. Both males and females had lesions in/on the lungs across both the test groups and the control groups.

|                                |                                       | Male                |                           |                           |                            | Female              |                           |                           |                            |
|--------------------------------|---------------------------------------|---------------------|---------------------------|---------------------------|----------------------------|---------------------|---------------------------|---------------------------|----------------------------|
|                                |                                       | Group 1,<br>Control | Group 2,<br>100 mg/kg/day | Group 3,<br>300 mg/kg/day | Group 4,<br>1000 mg/kg/day | Group 1,<br>Control | Group 2,<br>100 mg/kg/day | Group 3,<br>300 mg/kg/day | Group 4,<br>1000 mg/kg/day |
|                                | <b>Number of animals</b>              | 10                  | 10                        | 10                        | 10                         | 10                  | 10                        | 10                        | 10                         |
| <b>Large intestine, cecum</b>  | Examined                              | 10                  | 0                         | 0                         | 10                         | 10                  | 0                         | 0                         | 10                         |
|                                | N.V.L                                 | 10                  | -                         | -                         | 10                         | 10                  | -                         | -                         | 10                         |
| <b>Large intestine, colon</b>  | Examined                              | 10                  | 0                         | 0                         | 10                         | 10                  | 0                         | 0                         | 10                         |
|                                | N.V.L                                 | 10                  | -                         | -                         | 10                         | 10                  | -                         | -                         | 10                         |
| <b>Large intestine, rectum</b> | Examined                              | 10                  | 0                         | 0                         | 10                         | 10                  | 0                         | 0                         | 10                         |
|                                | N.V.L                                 | 10                  | -                         | -                         | 10                         | 10                  | -                         | -                         | 10                         |
| <b>Liver</b>                   | Examined                              | 10                  | 0                         | 3                         | 10                         | 10                  | 0                         | 0                         | 10                         |
|                                | N.V.L                                 | 9                   | -                         | 3                         | 8                          | 4                   | -                         | -                         | 5                          |
|                                | Minimal necrosis                      | 0                   | -                         | 0                         | 0                          | 1                   | -                         | -                         | 0                          |
|                                | Minimal infiltration mononuclear cell | 1                   | -                         | 0                         | 2                          | 5                   | -                         | -                         | 5                          |
| <b>Lung</b>                    | Examined                              | 10                  | 5                         | 5                         | 10                         | 10                  | 1                         | 1                         | 10                         |
|                                | N.V.L                                 | 5                   | 2                         | 3                         | 7                          | 9                   | 1                         | 0                         | 10                         |
|                                | Minimal congestion                    | 4                   | 3                         | 2                         | 3                          | 1                   | 0                         | 0                         | 0                          |
|                                | Mild haemorrhage                      | 0                   | 0                         | 0                         | 0                          | 0                   | 0                         | 1                         | 0                          |
| <b>Lymph node, mandibular</b>  | Minimal accumulation                  | 2                   | 0                         | 0                         | 0                          | 0                   | 0                         | 0                         | 0                          |
|                                | Examined                              | 10                  | 0                         | 0                         | 10                         | 10                  | 0                         | 0                         | 10                         |
|                                | N.V.L                                 | 10                  | -                         | -                         | 10                         | 10                  | -                         | -                         | 10                         |

Table E: Summary of the histopathology findings in alphabetic order; effect of UA on tissues L-S. N.V.L = no visible lesions. One male showed minimal infiltration of mononuclear cells in skeletal muscle and pancreas in the high dose group.

|                                   |                                         | Male                |                           |                           |                            | Female              |                           |                           |                            |
|-----------------------------------|-----------------------------------------|---------------------|---------------------------|---------------------------|----------------------------|---------------------|---------------------------|---------------------------|----------------------------|
|                                   |                                         | Group 1,<br>Control | Group 2,<br>100 mg/kg/day | Group 3,<br>300 mg/kg/day | Group 4,<br>1000 mg/kg/day | Group 1,<br>Control | Group 2,<br>100 mg/kg/day | Group 3,<br>300 mg/kg/day | Group 4,<br>1000 mg/kg/day |
| <b>Number of animals</b>          |                                         | 10                  | 10                        | 10                        | 10                         | 10                  | 10                        | 10                        | 10                         |
| <b>Lymph node, mesenteric</b>     | Examined                                | 10                  | 0                         | 0                         | 10                         | 10                  | 0                         | 0                         | 10                         |
|                                   | N.V.L                                   | 10                  | -                         | -                         | 10                         | 10                  | -                         | -                         | 10                         |
| <b>Muscle, skeletal</b>           | Examined                                | 10                  | 0                         | 0                         | 10                         | 10                  | 0                         | 0                         | 10                         |
|                                   | N.V.L                                   | 10                  | -                         | -                         | 9                          | 10                  | -                         | -                         | 10                         |
|                                   | Infiltration, mononuclear cell, minimal | 10                  | -                         | -                         | 1                          | 0                   | -                         | -                         | 0                          |
| <b>Nerve, optic</b>               | Examined                                | 0                   | 0                         | 0                         | 10                         | 10                  | 0                         | 0                         | 10                         |
|                                   | N.V.L                                   | 9                   | -                         | -                         | 10                         | 10                  | -                         | -                         | 10                         |
|                                   | Not examined, not present               | 1                   | 0                         | 0                         | 10                         | -                   | -                         | -                         | -                          |
| <b>Nerve, sciatic</b>             | Examined                                | 10                  | 0                         | 0                         | 10                         | 10                  | 0                         | 0                         | 10                         |
|                                   | N.V.L                                   | 10                  | -                         | -                         | 10                         | 10                  | -                         | -                         | 10                         |
| <b>Ovary</b>                      | Examined                                | -                   | -                         | -                         | -                          | 10                  | 0                         | 0                         | 10                         |
|                                   | N.V.L                                   | -                   | -                         | -                         | -                          | 10                  | -                         | -                         | 10                         |
| <b>Oviduct</b>                    | Examined                                | -                   | -                         | -                         | -                          | 10                  | 0                         | 0                         | 10                         |
|                                   | N.V.L                                   | -                   | -                         | -                         | -                          | 10                  | -                         | -                         | 10                         |
| <b>Pancreas</b>                   | Examined                                | 10                  | 0                         | 0                         | 10                         | 10                  | 0                         | 0                         | 10                         |
|                                   | N.V.L                                   | 10                  | -                         | -                         | 9                          | 10                  | -                         | -                         | 10                         |
|                                   | Minimal mononuclear cell infiltration   | 0                   | -                         | -                         | 1                          | 0                   | -                         | -                         | 0                          |
| <b>Skin</b>                       | Examined                                | 10                  | 0                         | 0                         | 10                         | 10                  | 0                         | 0                         | 10                         |
|                                   | N.V.L                                   | 10                  | -                         | -                         | 10                         | 10                  | -                         | -                         | 10                         |
| <b>Small intestines, duodenum</b> | Examined                                | 10                  | 0                         | 0                         | 10                         | 10                  | 0                         | 0                         | 10                         |
|                                   | N.V.L                                   | 10                  | -                         | -                         | 10                         | 10                  | -                         | -                         | 10                         |

Table G: Summary of the histopathology findings in alphabetic order; effect of UA on tissues T-V.N.V.L = no visible lesions. One male showed minimal infiltration of mononuclear cells in the urinary bladder in the high dose group. One female had minimal congestion of the thymus in the high dose group.

|                        |                                       | Male                |                           |                           |                            | Female              |                           |                           |                            |
|------------------------|---------------------------------------|---------------------|---------------------------|---------------------------|----------------------------|---------------------|---------------------------|---------------------------|----------------------------|
|                        |                                       | Group 1,<br>Control | Group 2,<br>100 mg/kg/day | Group 3,<br>300 mg/kg/day | Group 4,<br>1000 mg/kg/day | Group 1,<br>Control | Group 2,<br>100 mg/kg/day | Group 3,<br>300 mg/kg/day | Group 4,<br>1000 mg/kg/day |
|                        | <b>Number of animals</b>              | 10                  | 10                        | 10                        | 10                         | 10                  | 10                        | 10                        | 10                         |
| <b>Thymus</b>          | Examined                              | 10                  | 3                         | 3                         | 10                         | 10                  | 0                         | 2                         | 10                         |
|                        | N.V.L                                 | 6                   | 3                         | 0                         | 5                          | 6                   | -                         | 2                         | 9                          |
|                        | Minimal congestion                    | 4                   | 0                         | 2                         | 4                          | 4                   | -                         | 0                         | 1                          |
|                        | Mild congestion                       | 0                   | 0                         | 0                         | 1                          | 0                   | -                         | 0                         | 0                          |
|                        | Minimal haemorrhage                   | 0                   | 0                         | 1                         | 0                          | 0                   | -                         | 0                         | 0                          |
| <b>Tong</b>            | Examined                              | 10                  | 0                         | 0                         | 10                         | 10                  | 0                         | 0                         | 10                         |
|                        | N.V.L                                 | 10                  | -                         | -                         | 10                         | 10                  | -                         | -                         | 10                         |
| <b>Trachea</b>         | Submitted                             | 10                  | 0                         | 0                         | 10                         | 10                  | 0                         | 0                         | 10                         |
|                        | N.V.L                                 | 10                  | -                         | -                         | 10                         | 10                  | -                         | -                         | 10                         |
| <b>Ureter</b>          | Submitted                             | 10                  | 0                         | 0                         | 10                         | 10                  | 0                         | 0                         | 9                          |
|                        | N.V.L                                 | 10                  | -                         | -                         | 10                         | 10                  | -                         | -                         | 9                          |
|                        | Not present in section                | -                   | -                         | -                         | -                          | 0                   | -                         | -                         | 1                          |
| <b>Urinary bladder</b> | Submitted                             | 10                  | 0                         | 0                         | 10                         | 10                  | 0                         | 0                         | 10                         |
|                        | N.V.L                                 | 10                  | -                         | -                         | 10                         | 10                  | -                         | -                         | 10                         |
|                        | Minimal infiltration mononuclear cell | 0                   | -                         | -                         | 1                          | 0                   | -                         | -                         | 0                          |
| <b>Uterus</b>          | Examined                              | -                   | -                         | -                         | -                          | 10                  | 0                         | 0                         | 10                         |
|                        | N.V.L                                 | -                   | -                         | -                         | -                          | 10                  | -                         | -                         | 10                         |
|                        | Cyst                                  | -                   | -                         | -                         | -                          | 1                   | -                         | -                         | 0                          |
| <b>Vagina</b>          | Submitted                             | -                   | -                         | -                         | -                          | 10                  | 0                         | 0                         | 10                         |
|                        | N.V.L                                 | -                   | -                         | -                         | -                          | 10                  | -                         | -                         | 10                         |
